# Supplementary material
Source: HighWire-hosted journal article supplement (https://gut.bmj.com/content/68/11/2080)

## Supplementary file on prevalence of lactose malabsorption in different countries

*Storhaug CL, Fosse SK, Fadnes LT: Country, regional, and global estimates for lactose malabsorption in adults: a systematic review and meta-analysis. Lancet Gastroenterol Hepatol 2017.*

*Christian Løvold Storhaug<sup>1</sup>, Svein Kjetil Fosse<sup>1</sup>, Lars T Fadnes<sup>1,2</sup>*

<sup>1</sup> *Department of Global Public Health and Primary Care, University of Bergen, Norway*

<sup>2</sup> *Department of Addiction Medicine, Haukeland University Hospital*

### Content in document

1. **Figure S1:** Prevalence of lactose malabsorption in different countries assessed with all methods.
2. **Figure S2:** Prevalence of lactose malabsorption in different countries assessed with genotyping.
3. **Figure S3:** Prevalence of lactose malabsorption in different countries assessed with LTT.
4. **Figure S4:** Prevalence of lactose malabsorption in different countries assessed with HBT.

**Figure S1:** Prevalence of lactose malabsorption in different countries assessed with all methods.

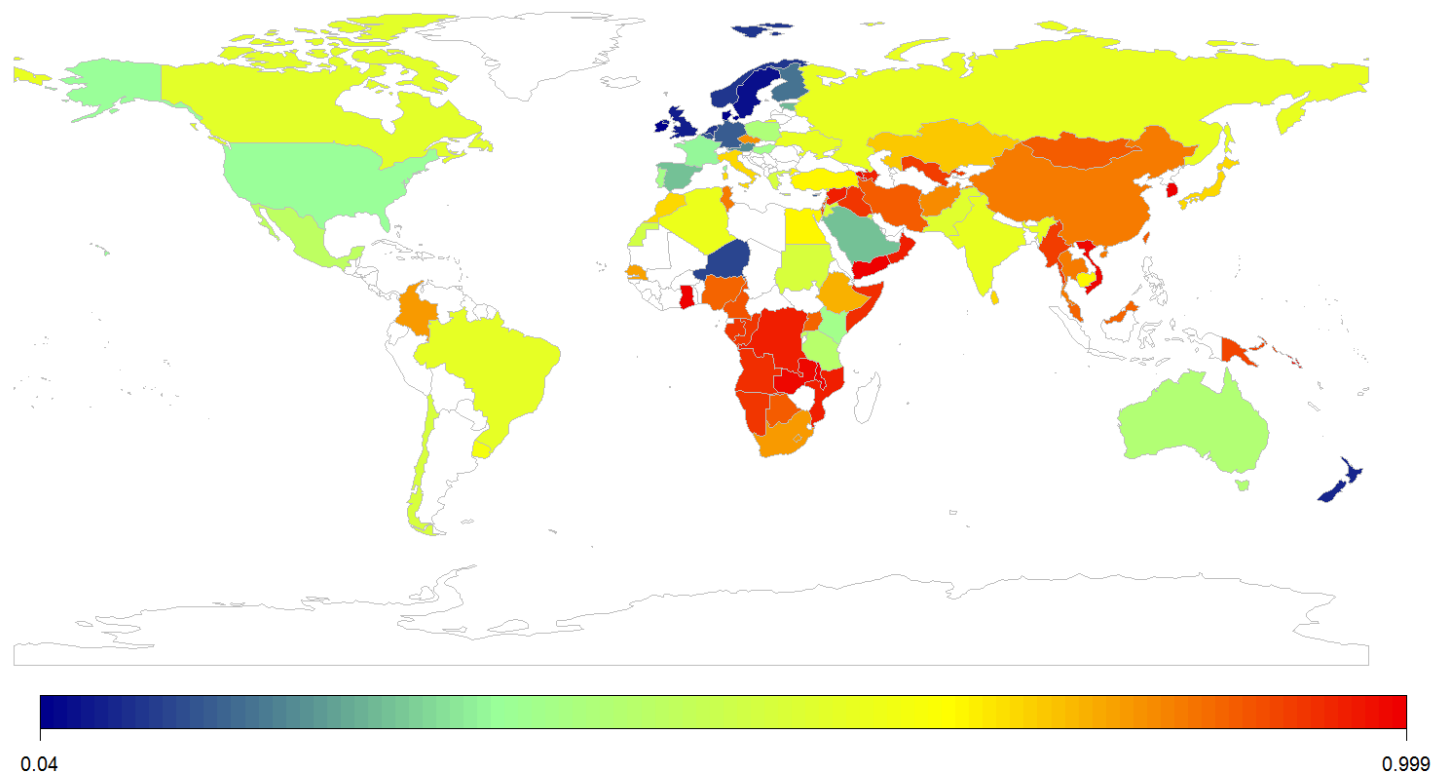

**Figure S2:** Prevalence of lactose malabsorption in different countries assessed with genotyping.

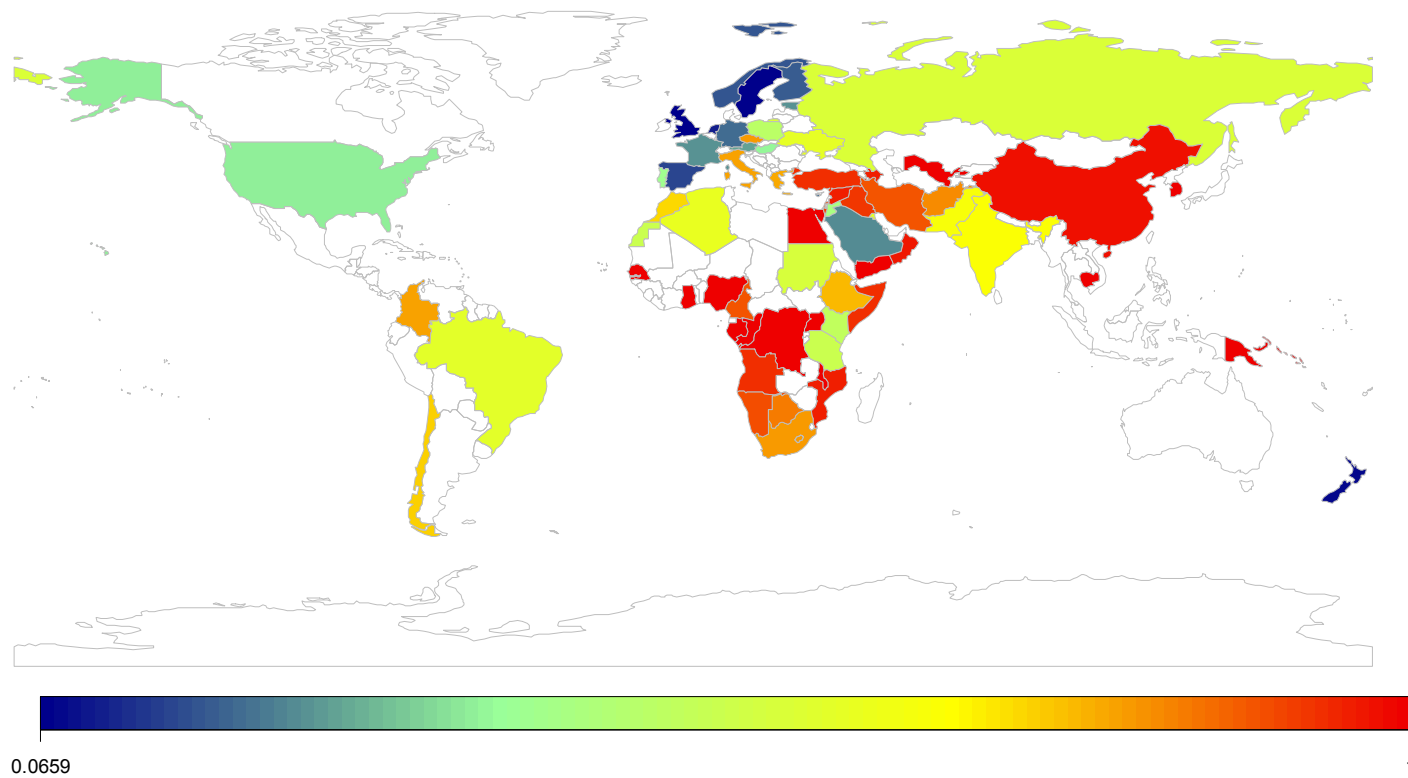

**Figure S3:** Prevalence of lactose malabsorption in different countries assessed with LTT.

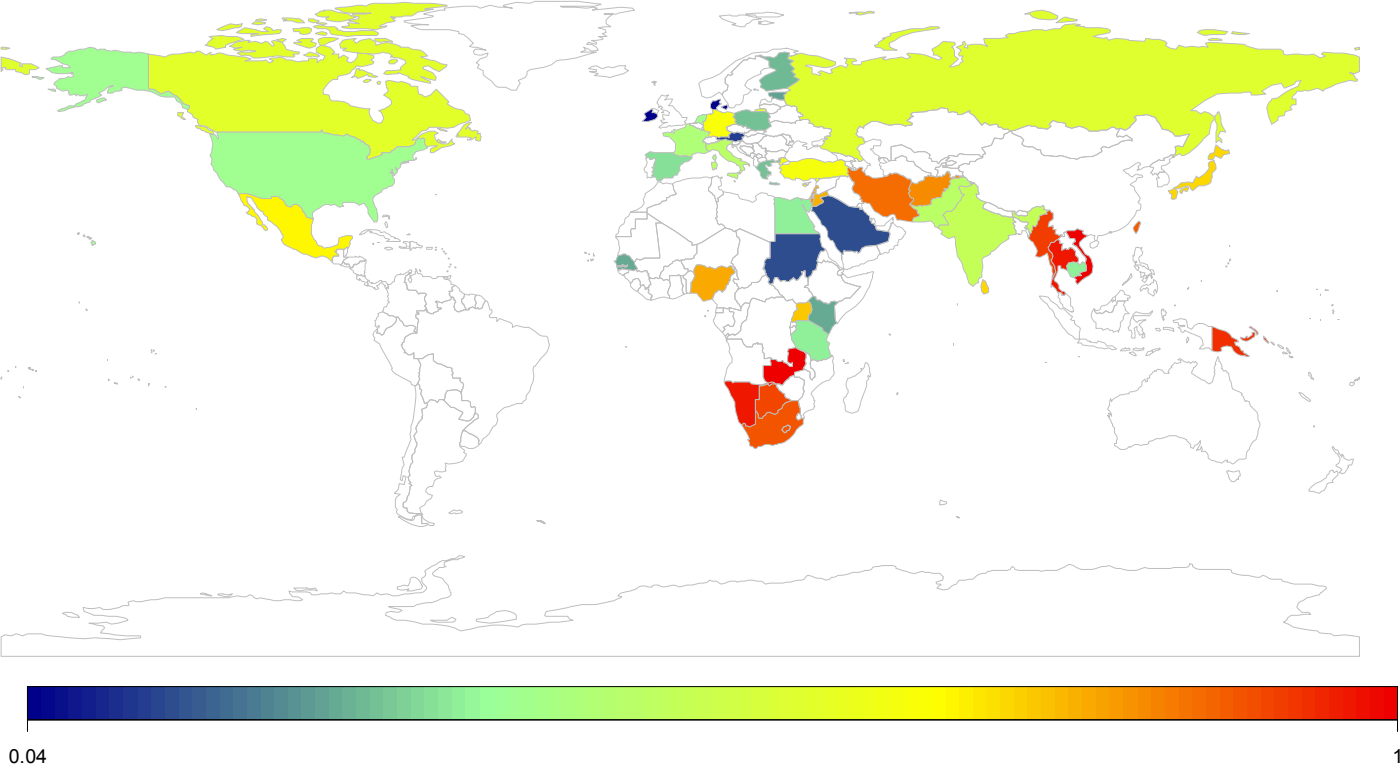

**Figure S4:** Prevalence of lactose malabsorption in different countries assessed with HBT.

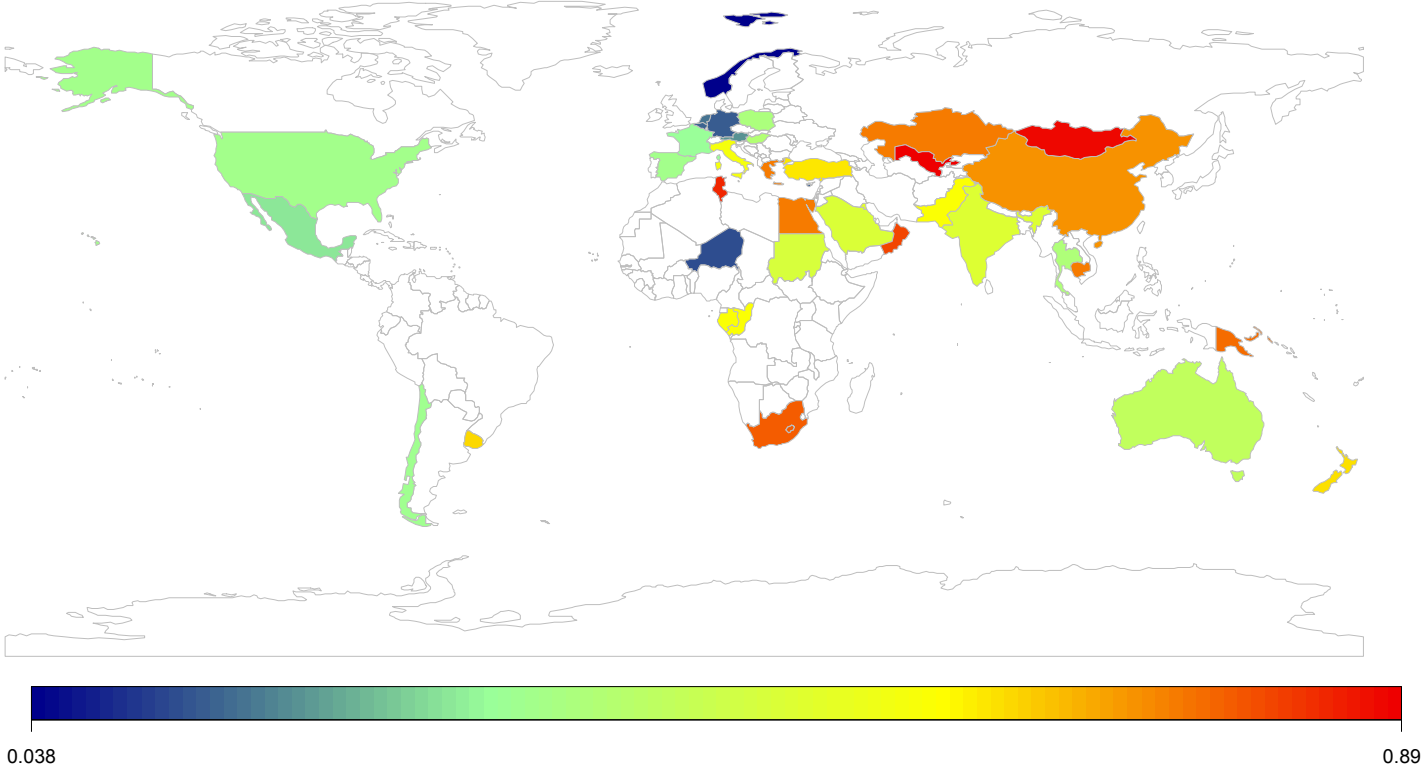

Supplement: inline-supplementary-material-2 [file inline-supplementary-material-2.pdf]
